# Supplementary material for: Reduced Activity of SRY and its Target Enhancer Sox9-TESCO in a Mouse Species with X*Y Sex Reversal
Source: PubMed Central journal article supplement (PMC5290746; doi:10.1038/srep41378), 2017-02-03
Supplement: srep41378-s1.pdf [file srep41378-s1.pdf]

## **Supplementary Information**

# **Reduced Activity of SRY and its Target Enhancer *Sox9*-TESCO in a Mouse Species with X\*Y Sex Reversal**

**Liang Zhao<sup>1</sup>, Alexander Quinn<sup>1</sup>, Ee Ting Ng<sup>1</sup>, Frederic Veyrunes<sup>2</sup> and Peter Koopman<sup>1\*</sup>**

1. Institute for Molecular Bioscience, The University of Queensland, Brisbane, QLD 4072, Australia
2. Institut des Sciences de l'Evolution de Montpellier, Université Montpellier II, CNRS, Montpellier, France

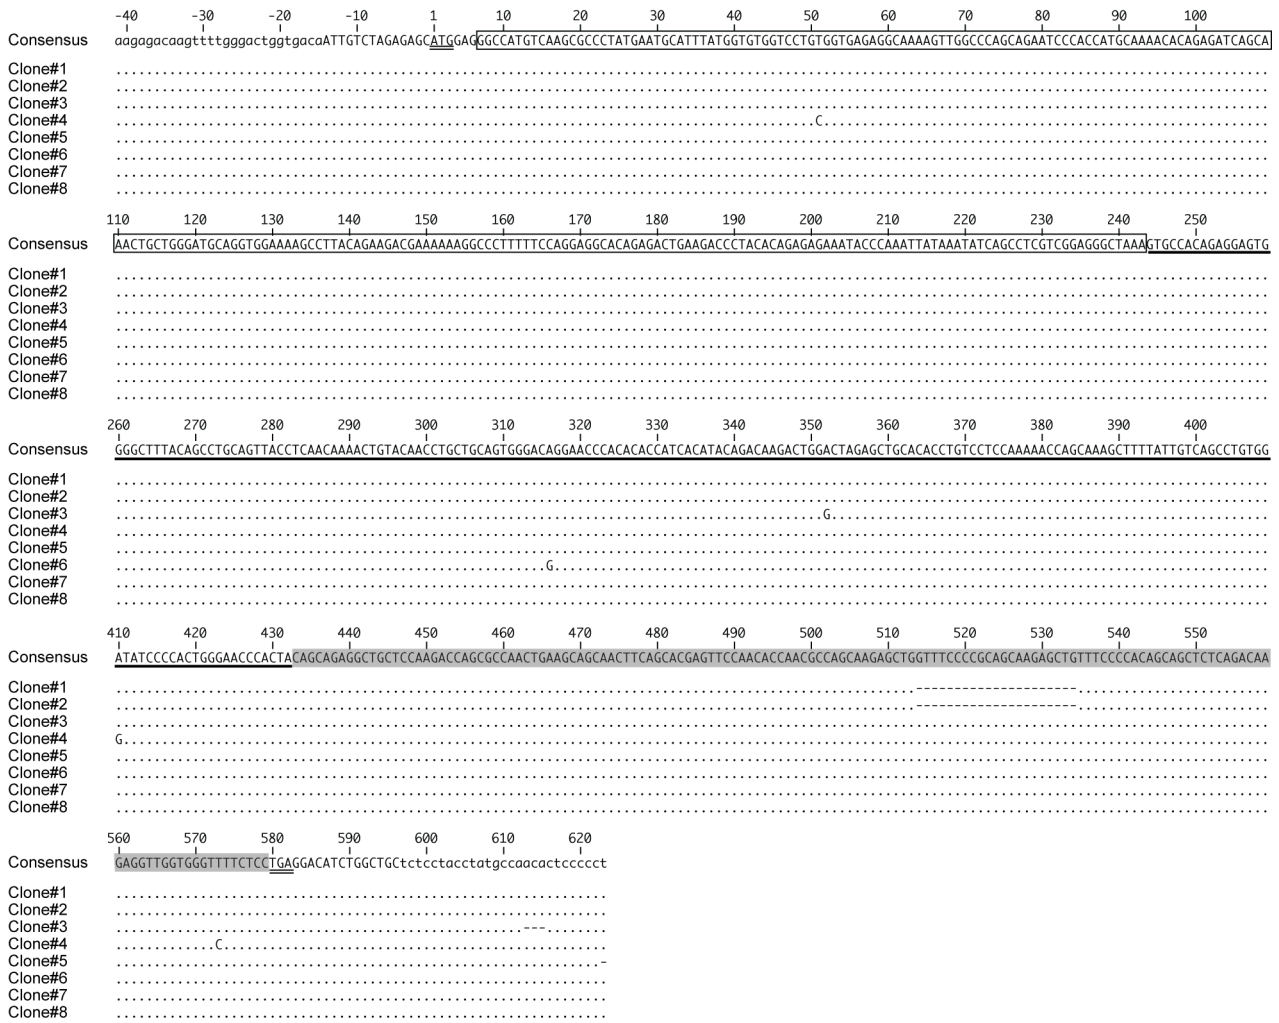

**Supplementary Figure S1. Nucleotide sequence alignment of eight independent *M. minutoides* Sry clones.** Five haplotypes were identified (see also Table 1). The consensus sequence is displayed above the alignment. Sequences identical to the consensus are indicated by dots, while missing nucleotides are depicted by hyphens. Binding sites of PCR primers are in lower case. Start and stop codons are double-underlined. Sequences encoding the HMG, Bridge, and polyQ domains are boxed, underlined or in grey, respectively.

```

-40   -30   -20   -10    1    10    20    30    40    50    60    70    80    90   100
Consensus aagagacaagttttgggactggtgacaATTGCTAGAGAGCATGGAGGGCCATGTCAAGCGGCTATGAATGCATTTATGGTGTGGTCTGTGGGGAGAGGCAGAGATTGGCCAGCAGAATCCAGCATGCAAAACACAGAGATCAGCA
Clone#1 .....
Clone#2 .....
Clone#3 .....
Clone#4 .....
Clone#5 .....
Clone#6 .....
Clone#7 .....
Clone#8 .....

110   120   130   140   150   160   170   180   190   200   210   220   230   240   250
Consensus AGCTGTGGGATGCAGGTGGAAAAGCCTTACAGAAGCGGAAAAAGGCCCTTTTCCAGGAGGCACAGAGACTGAAGACCTTACACAGAGAGAAATACCCAAACTATAAATATCAGCCTCATCGGAGGGCTAAAGTGCCACAGAGGATGG
Clone#1 .....
Clone#2 .....
Clone#3 .....
Clone#4 .....
Clone#5 .....
Clone#6 .....
Clone#7 .....
Clone#8 .....

260   270   280   290   300   310   320   330   340   350   360   370   380   390   400
Consensus GTGCTTTACAGACTGCAGTTACCTCAACAAAACGTGTACAACTGCTGCAGTGGGACAGGAACCCACACACATCACATACAGACAAGACTGGACTAGAGCTGCACACTGTCTCTCAAAAACAGCAAGCTTTTATTGTACGCTGTGG
Clone#1 .....
Clone#2 .....
Clone#3 .....
Clone#4 .....
Clone#5 .....
Clone#6 .....
Clone#7 .....
Clone#8 .....

410   420   430   440   450   460   470   480   490   500   510   520   530   540   550
Consensus ATATCCCCTACTGGGAACCCACTACAGCAGCAGCAGCAGCAGCAGCAGCAGCAGTCCACCACCACAGCAGCAGCAGCAGCAGTCCACCAGCAGCAGCAGCTGAAGCATCAGCATCAGCAGCAGTCTACAGCAGCAGCAGC
Clone#1 .....
Clone#2 .....
Clone#3 .....
Clone#4 .....
Clone#5 .....
Clone#6 .....
Clone#7 .....
Clone#8 .....

560   570   580   590   600   610   620   630   640   650   660   670   680   690   700
Consensus AGCAGCACCAGTTCACCAGCAGCAGCAGCAGCAGCAGCAGCAGCAGCAACAATTCACCAGCAGCAGCAGCAGCAACAATTCACCAGCAGCAGCAACAGAAGCAGCAGCAGCAACAGTTCACCACCAGCAGCAGCAGCAGC
Clone#1 .....
Clone#2 .....
Clone#3 .....
Clone#4 .....
Clone#5 .....
Clone#6 .....
Clone#7 .....
Clone#8 .....

710   720   730   740   750   760   770   780   790   800   810   820   830   840   850
Consensus ATAAGCAGCAGCAGCAGCAGTTCACCACCAGCAGCAGCAGCAGCAGCAGCAGCAGCAGTCCACCAGCAGCAGCAGCAGCAGCAGCAGCAGTACTAGTTCACCACCAGCAGCAGCAGCAACAGTTCACCACCAGCAGCAGCAGTTC
Clone#1 .....
Clone#2 .....
Clone#3 .....
Clone#4 .....
Clone#5 .....
Clone#6 .....
Clone#7 .....
Clone#8 .....

860   870   880   890   900   910   920   930   940   950   960   970   980   990   1000
Consensus CACCAGCAGCAGCAGCAAGAAGCAGCACCAGCAGCAGCAGTTCACCAGCAATAGCAGCAGCAGCAGCAGCAGCAGCAACAGCAGCAGCAGCAGCAGCAGCAGCAGCAGTTCACCACCAGCAGTCAACTACTACTAAACAGCT
Clone#1 .....
Clone#2 .....
Clone#3 .....
Clone#4 .....
Clone#5 .....
Clone#6 .....
Clone#7 .....
Clone#8 .....

1010  1020  1030  1040  1050  1060  1070  1080  1090  1100  1110
Consensus GACATCACTGGTGAAGCATATACTGTATCAGGAGCATCTCAGAAAAGCCCTGTGGTAGGCAGTCTCATGACTGGCCTTTtctcctacctatgccaacctccccct
Clone#1 .....
Clone#2 .....
Clone#3 .....
Clone#4 .....
Clone#5 .....
Clone#6 .....
Clone#7 .....
Clone#8 .....

```

**Supplementary Figure S2. Nucleotide sequence alignment of eight independent *M. mattheyi* *Sry* clones.** Seven haplotypes were identified (see also Table 1). The consensus sequence is displayed above the alignment. Sequences identical to the consensus are indicated by dots, while

missing nucleotides are depicted by hyphens. Binding sites of PCR primers are in lower case. Start and stop codons are double-underlined. Sequences encoding the HMG, Bridge, and polyQ domains are boxed, underlined or in grey, respectively.

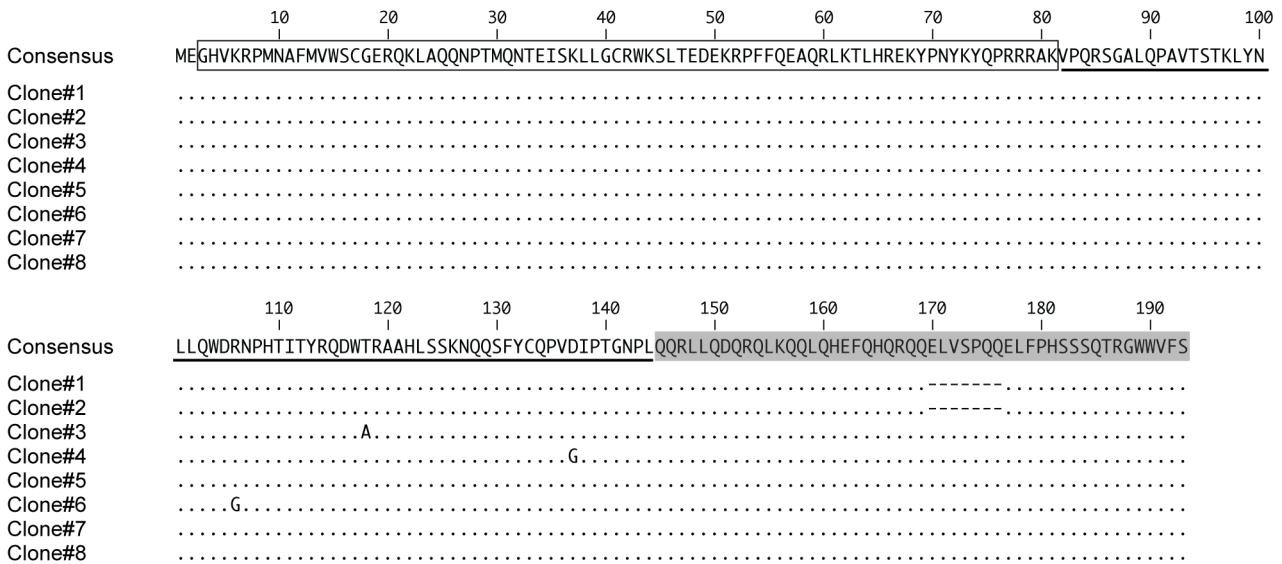

**Supplementary Figure S3. Alignment of the deduced SRY peptide sequences in *M. minutoides*.**

The consensus sequence is displayed above the alignment. Residues identical to the consensus are indicated by dots, while missing residues are depicted by hyphens. The HMG, Bridge, and polyQ domains are boxed, underlined or in grey, respectively. A deletion in clones #1 and #2 (E170\_Q176del; *M. minutoides* Sry haplotype *a*, Table 1) resulted in the loss of one polyglutamine block.



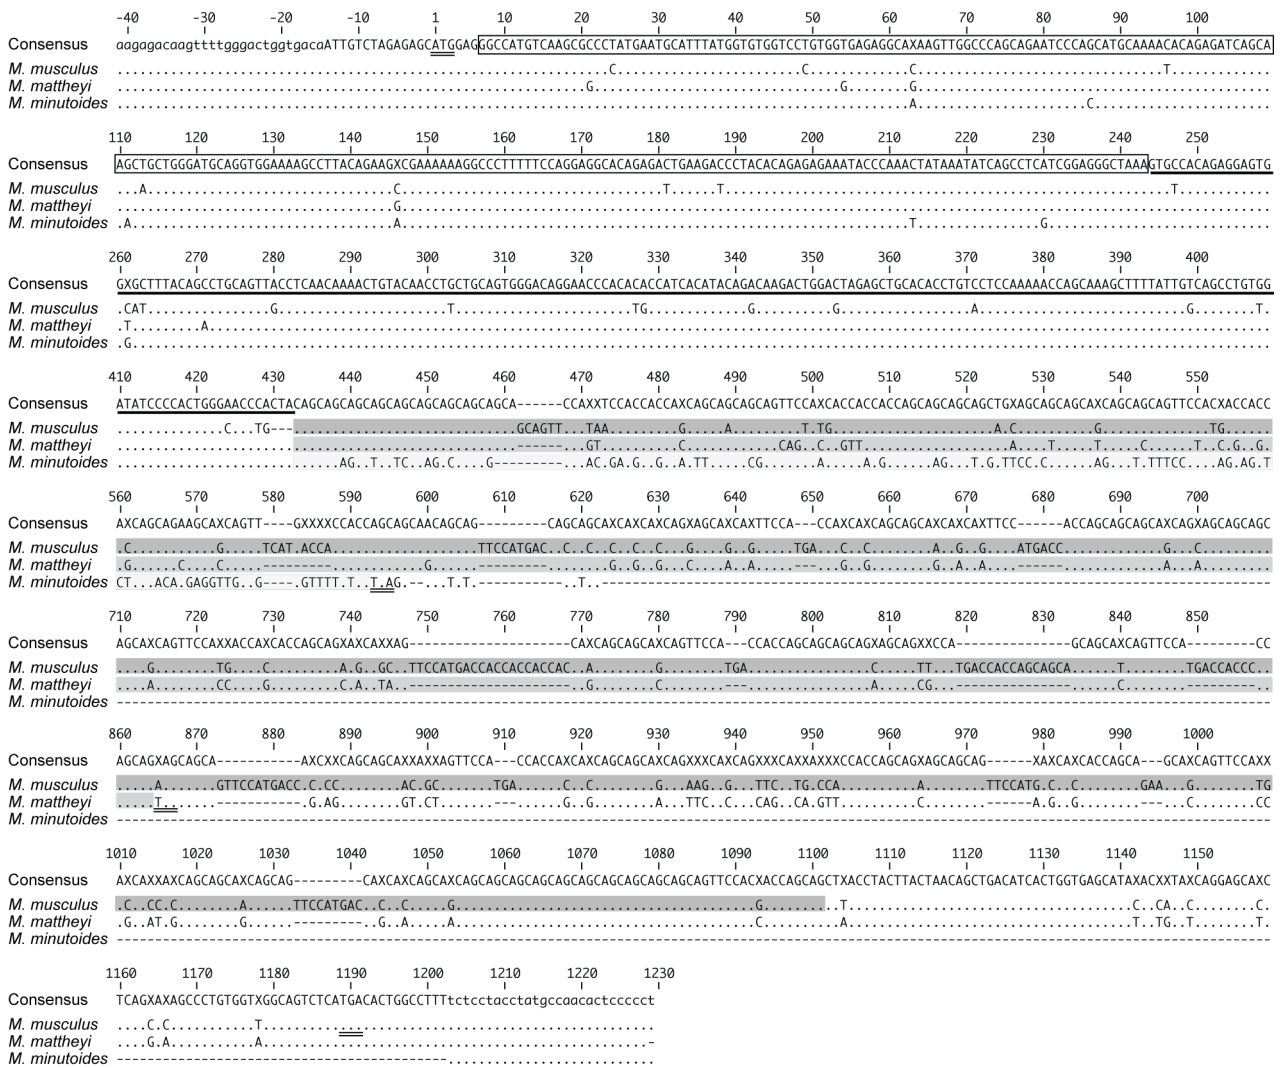

**Supplementary Figure S5. Nucleotide sequence comparison of *Sry* sequences in *M. minutoides*, *M. mattheyi*, and *M. musculus*.** Reference *Sry* sequences in *M. minutoides* (clone #7, Supplementary Fig S1; see also Table 1) and *M. mattheyi* (clone #4, Supplementary Fig S2) are used here. *M. musculus* *Sry* sequence is retrieved from mm10 reference genome. The consensus is displayed above the alignment. Sequences identical to the consensus are indicated by dots, while missing nucleotides are depicted by hyphens. Binding sites of PCR primers are in lower case. Start and stop codons are double-underlined. Sequences encoding the HMG, Bridge, and polyQ domains are boxed, underlined or in grey, respectively.

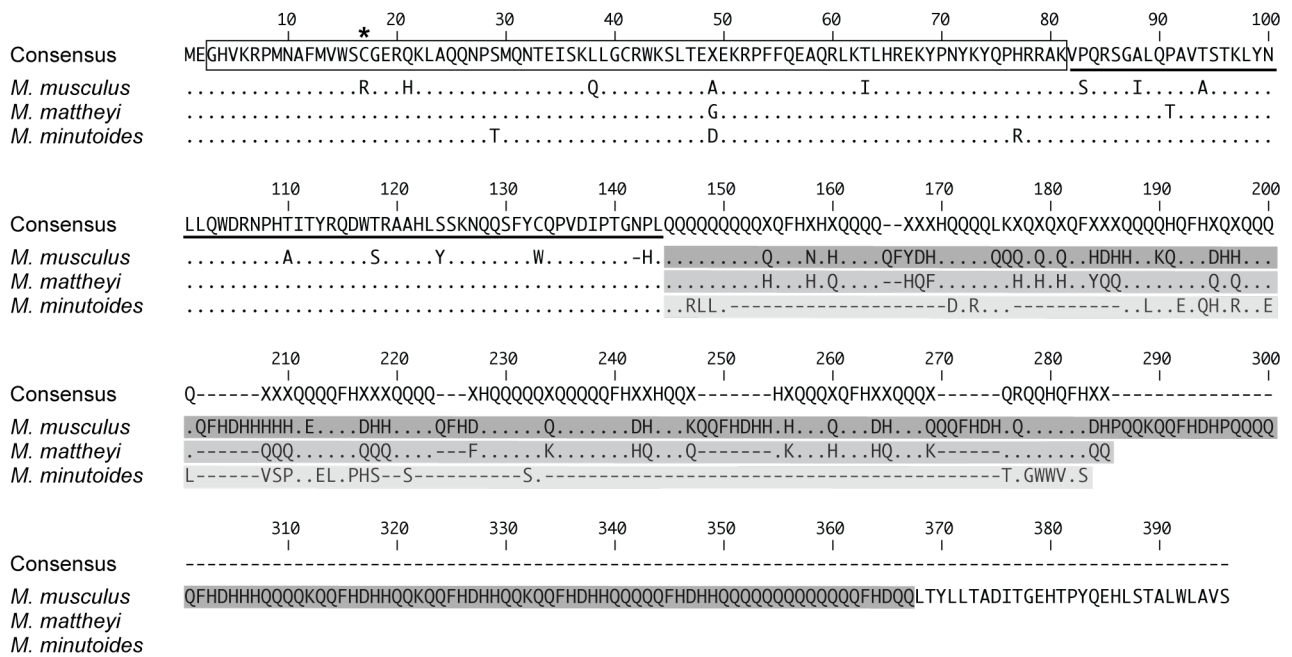

**Supplementary Figure S6. Comparison of deduced SRY peptide sequences in *M. musculus*, *M. mattheyi*, and *M. minutoides*.** Reference SRY sequences in *M. minutoides* (clone #7, Supplementary Fig S1; see also Table 1) and *M. mattheyi* (clone #4, Supplementary Fig S2) are used here. *M. musculus* SRY sequence is retrieved from mm10 reference genome. The consensus sequence is displayed above the alignment. Residues identical to the consensus are indicated by dots, while missing residues are depicted by hyphens. The HMG, Bridge, and polyQ domains are boxed, underlined or in grey, respectively. \* indicates an amino acid substitution (R17C) in *M. mattheyi* and *M. minutoides*, compared with *M. musculus*.

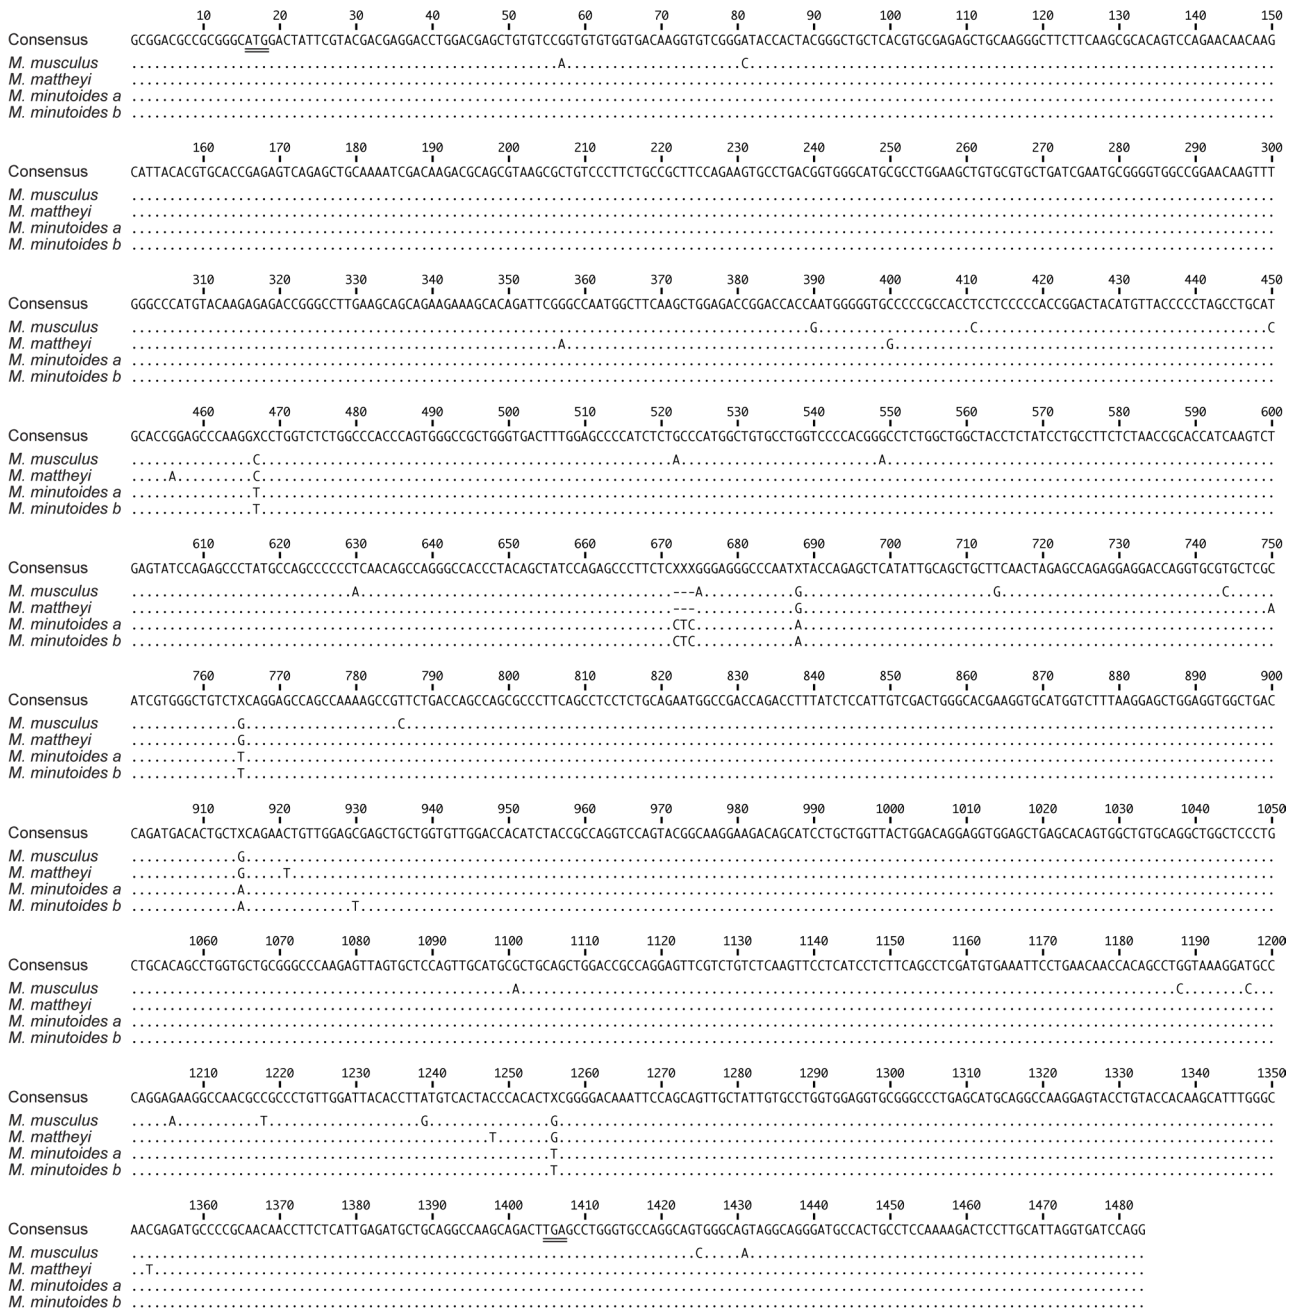

**Supplementary Figure S7. Nucleotide sequence alignment of *Sfl* coding sequences in *M. musculus*, *M. mattheyi*, and *M. minutoides*.** *M. mattheyi* and *M. minutoides* *Sfl* coding sequences are assembled from sequencing results of individual *Sfl* exons 2–7. The *M. mattheyi* individual analysed appeared to carry two identical *Sfl* alleles, whereas two different *Sfl* alleles (*a*, *b*) were identified in the *M. minutoides* individual. *M. musculus* *Sfl* sequence is retrieved from mm10 reference genome. The consensus sequence is displayed above the alignment. Sequences identical to the consensus are indicated by dots, while missing nucleotides are depicted by hyphens. Start and stop codons are double-underlined.



|                      |                                                                                        |           |        |        |       |       |       |       |       |       |
|----------------------|----------------------------------------------------------------------------------------|-----------|--------|--------|-------|-------|-------|-------|-------|-------|
|                      | 10                                                                                     | 20        | 30     | 40     | 50    | 60    | 70    | 80    | 90    | 100   |
| Consensus            | MDYSYDEDLDELCPVCGDKVSGYHYGLLTCESCKGFFKRTVQNNKHYYCTESQSCCKIDKTQRKRCPFCRFQKCLTVGMRL      | EAVRADRM  | RGGRNK | FGPMYK |       |       |       |       |       |       |
| <i>M. musculus</i>   | .....                                                                                  | .....     | .....  | .....  | ..... | ..... | ..... | ..... | ..... | ..... |
| <i>M. mattheyi</i>   | .....                                                                                  | .....     | .....  | .....  | ..... | ..... | ..... | ..... | ..... | ..... |
| <i>M. minutoides</i> | .....                                                                                  | .....     | .....  | .....  | ..... | ..... | ..... | ..... | ..... | ..... |
|                      | 110                                                                                    | 120       | 130    | 140    | 150   | 160   | 170   | 180   | 190   | 200   |
| Consensus            | RDRALKQQKKAQIRANGFKLETGPPMGVPPPPPPDYMLPPSLHAPEPKALVSGPPSGPLGDFGAPSLPMAVPGPHGPLAGYLYPAF | SNRTIK    | SEYPEP |        |       |       |       |       |       |       |
| <i>M. musculus</i>   | .....                                                                                  | .....     | .....  | .....  | ..... | ..... | ..... | ..... | ..... | ..... |
| <i>M. mattheyi</i>   | .....                                                                                  | .....     | .....  | .....  | ..... | ..... | ..... | ..... | ..... | ..... |
| <i>M. minutoides</i> | .....                                                                                  | .....     | .....  | .....  | ..... | ..... | ..... | ..... | ..... | ..... |
|                      | 210                                                                                    | 220       | 230    | 240    | 250   | 260   | 270   | 280   | 290   | 300   |
| Consensus            | YASPPQQGPPYSYPEPFS-GGPNVPELILQLLQLEPEEDQVRARIVGCLQEPAKSRSDQPAPFSLLCRMADQTFISIVDWARRCMV | FKELVADQ  | MTLL   |        |       |       |       |       |       |       |
| <i>M. musculus</i>   | .....                                                                                  | .....     | .....  | .....  | ..... | ..... | ..... | ..... | ..... | ..... |
| <i>M. mattheyi</i>   | .....                                                                                  | .....     | .....  | .....  | ..... | ..... | ..... | ..... | ..... | ..... |
| <i>M. minutoides</i> | .....                                                                                  | .....     | .....  | .....  | ..... | ..... | ..... | ..... | ..... | ..... |
|                      | 310                                                                                    | 320       | 330    | 340    | 350   | 360   | 370   | 380   | 390   | 400   |
| Consensus            | QNCWSELLVLDHIYRQVQYQKEDSILLVTGQEVELSTVAVQAGSLLHSLVLRQELVQLHALQLDRQEFVCLKFLILFSLDVKFL   | NNHSLVKDA | QEKAN  |        |       |       |       |       |       |       |
| <i>M. musculus</i>   | .....                                                                                  | .....     | .....  | .....  | ..... | ..... | ..... | ..... | ..... | ..... |
| <i>M. mattheyi</i>   | .....                                                                                  | .....     | .....  | .....  | ..... | ..... | ..... | ..... | ..... | ..... |
| <i>M. minutoides</i> | .....                                                                                  | .....     | .....  | .....  | ..... | ..... | ..... | ..... | ..... | ..... |
|                      | 410                                                                                    | 420       | 430    | 440    | 450   | 460   |       |       |       |       |
| Consensus            | AALLDYTLCHYPHCGDKFQQLLLCLVEVRALSMQAKEYLYHKHLGNEMPRNLLIEMLQAKQT                         |           |        |        |       |       |       |       |       |       |
| <i>M. musculus</i>   | .....                                                                                  | .....     | .....  | .....  | ..... | ..... | ..... | ..... | ..... | ..... |
| <i>M. mattheyi</i>   | .....                                                                                  | .....     | .....  | .....  | ..... | ..... | ..... | ..... | ..... | ..... |
| <i>M. minutoides</i> | .....                                                                                  | .....     | .....  | .....  | ..... | ..... | ..... | ..... | ..... | ..... |

**Supplementary Figure S8. Deduced peptide sequence alignment of SF1 in *M. musculus*, *M. mattheyi*, and *M. minutoides*.** Note the two *M. minutoides* *Sf1* alleles (S7 Fig) encode the same protein. *M. musculus* SF1 sequence is retrieved from mm10 reference genome. The consensus sequence is displayed above the alignment. Residues identical to the consensus are indicated by dots, while missing residues are depicted by hyphens.

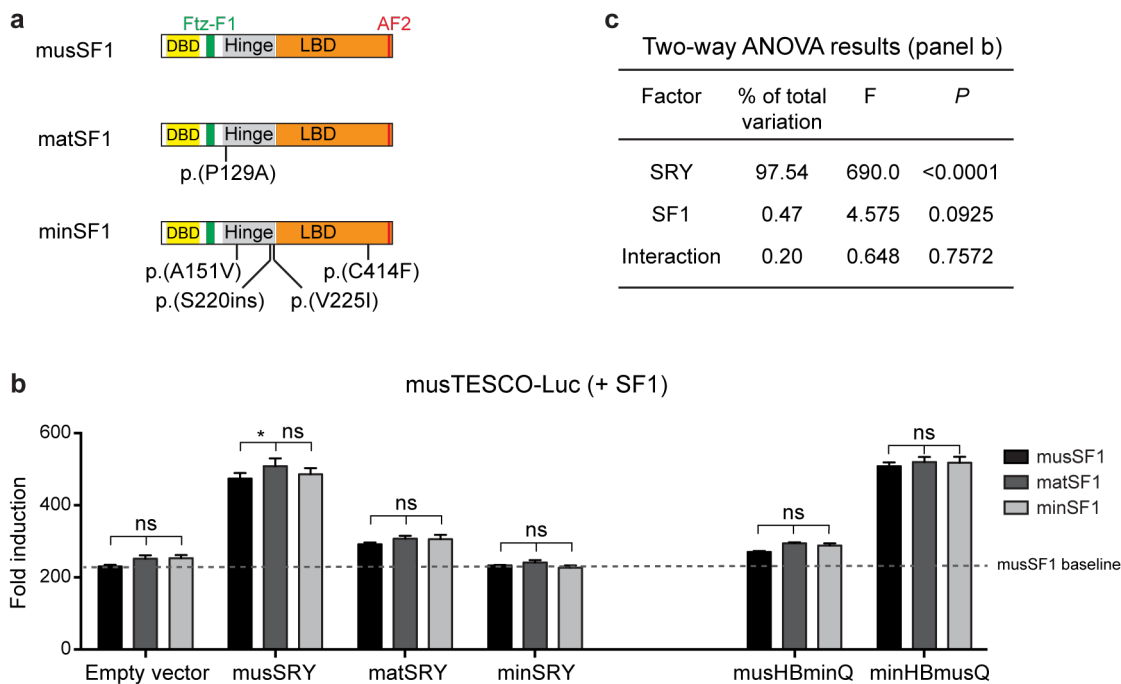

**Supplementary Figure S9. SF1 proteins from *M. musculus*, *M. mattheyi*, and *M. minutoides* show similar activities in musTESCO-Luc reporter assays.** (a) Schematic of SF1 proteins from three *Mus* species: *M. musculus* (musSF1), *M. mattheyi* (matSF1), and *M. minutoides* (minSF1). DBD, DNA binding domain; LBD, ligand-binding domain. Non-synonymous sequence changes compared with musSF1 are indicated in matSF1 and minSF1. (b) Synergistic activation of musTESCO-Luc by various combinations of SRY (including two chimeric mutants) and SF1 from *M. musculus*, *M. mattheyi*, and *M. minutoides* were tested using *in vitro* reporter assays. The luciferase activity of musTESCO-Luc co-transfected with the empty vector in the absence of SF1 was set to 1. For simplicity, only the +SF1 data are presented here as mean  $\pm$  s.e.m (n = 3), as the -SF1 data essentially showed unchanged base level activities of musTESCO-Luc reporter. Dashed line indicates the level of empty vector + musSF1. (\*)  $P < 0.05$ , Tukey's multiple comparisons test. ns, not significant. (c) Summary of two-way repeated measures ANOVA results of (b).

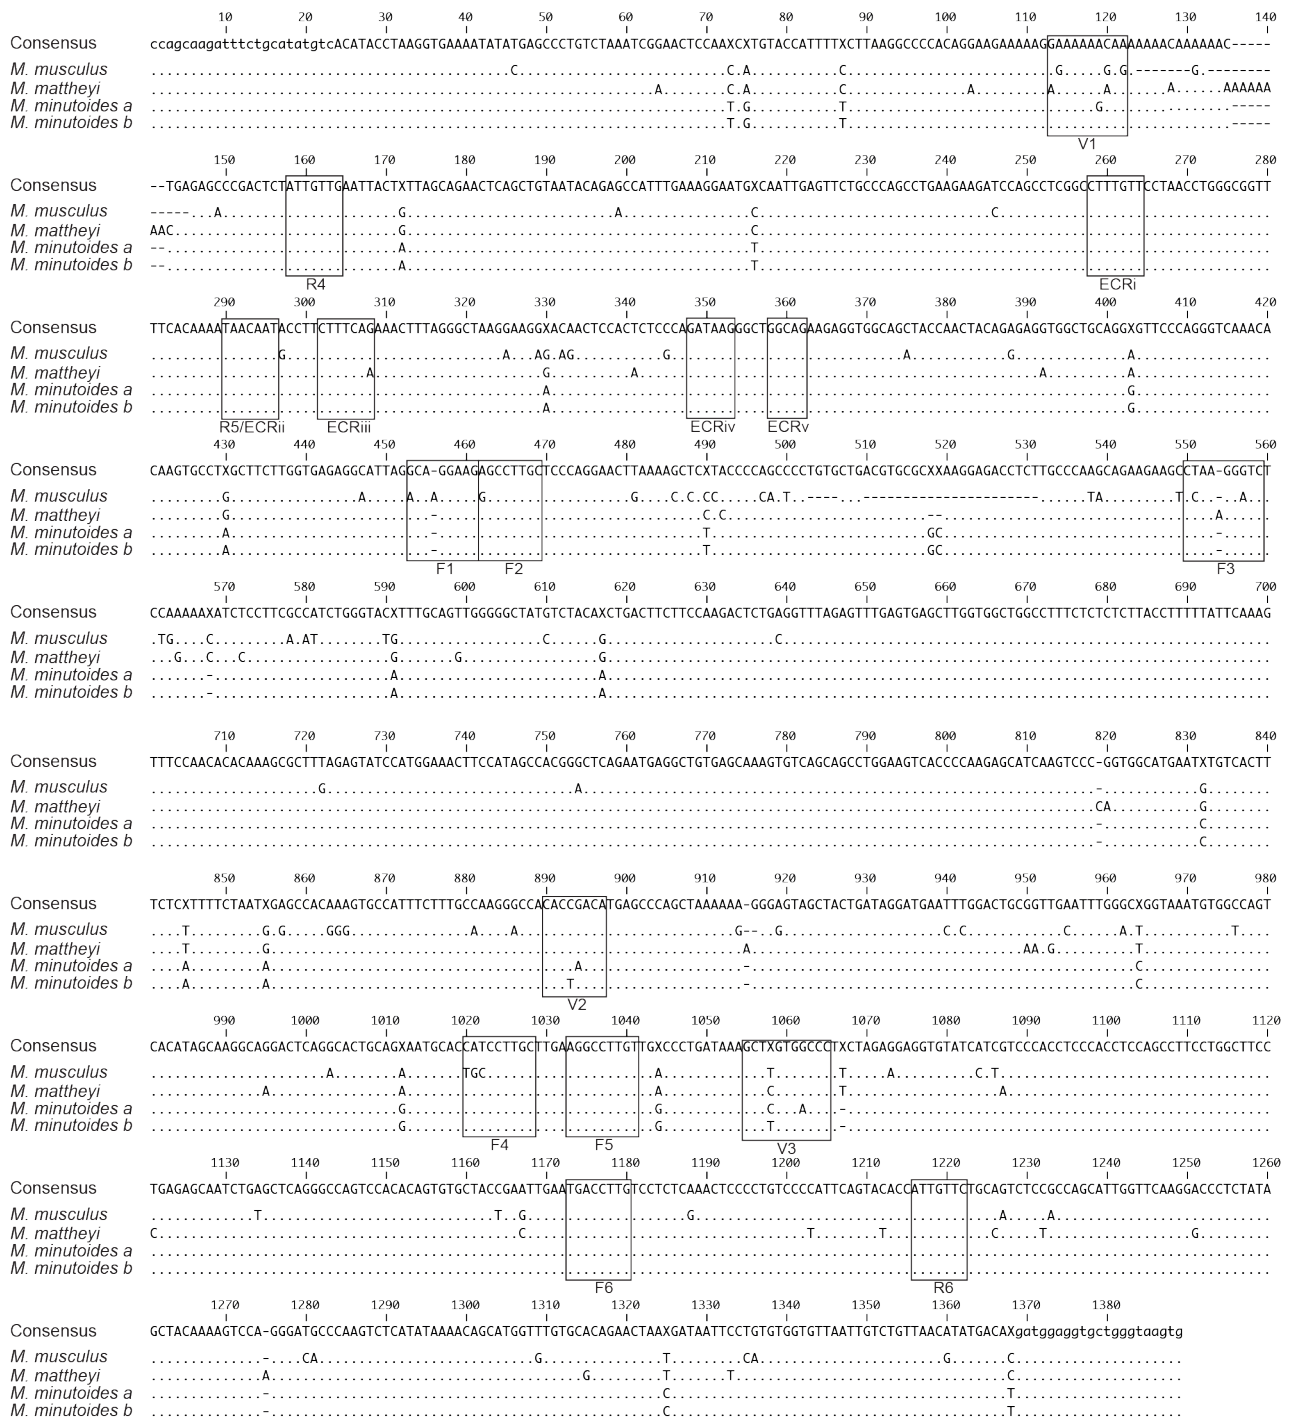

**Supplementary Figure S10. Nucleotide sequence alignment of TESCO sequences in *M. musculus*, *M. mattheyi*, and *M. minutoides*.** The *M. mattheyi* individual analysed appeared to carry two identical copies of TESCO, whereas two TESCO haplotypes were identified in *M. minutoides*. The binding sites of SRY and SF1 identified in *M. musculus* (R4-5 and F1-6, respectively), the evolutionarily conserved sites (ECRi-v), and the sequence variations between the two haplotypes of minTESCO (V1-3) are highlighted in boxes. SRY binding sites and most of the ECR sites remain

unchanged in mat/minTESCO, whereas several SF1 binding sites showed sequence variations in *M. mattheyi* and *M. minutoides*. The consensus sequence is displayed above the alignment. Identical residues are indicated by dots, while missing residues are depicted by hyphens. Binding sites of PCR primers are in lower case.

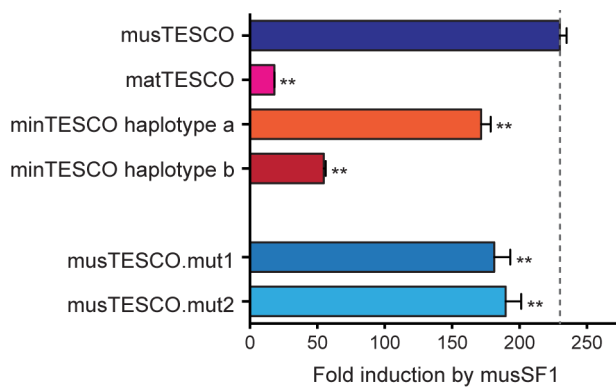

**Supplementary Figure S11. TESCO enhancer in *M. minutoides* and *M. mattheyi* showed reduced response to musSF1.** Mutations of SF1 binding sites F1-4 in musTESCO to the corresponding sequence in matTESCO (musTESCO.mut1-Luc) or minTESCO (musTESCO.mut2-Luc) caused mildly reduced response to musSF1. Data are presented as fold induction in the presence versus the absence of musSF1. Error bars: s.e.m. ( $n = 3$ ). Dashed line indicates the level of musTESCO. (\*\*)  $P < 0.01$  vs. musTESCO, one-way repeated measures ANOVA with Dunnett's multiple comparisons test.

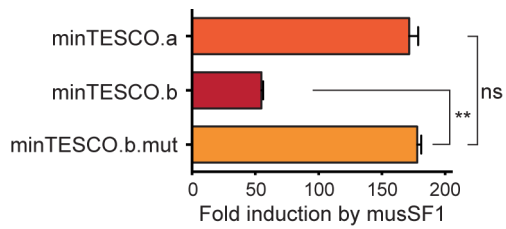

**Supplementary Figure S12. Sequence variations at the V3 site between two haplotypes of *M. minutoides* TESCO results in reduced response to musSF1.** minTESCO.b.mut with V3 site mutated to the corresponding sequence in minTESCO.a showed fully restored response to musSF1. Data are presented as TESCO luciferase activity normalized to co-transfected CMV-renilla luciferase activity. Error bars: s.e.m. ( $n = 3$ ). (\*\*)  $P < 0.01$ , one-way repeated measures ANOVA with Dunnett's multiple comparisons test. ns, not significant.

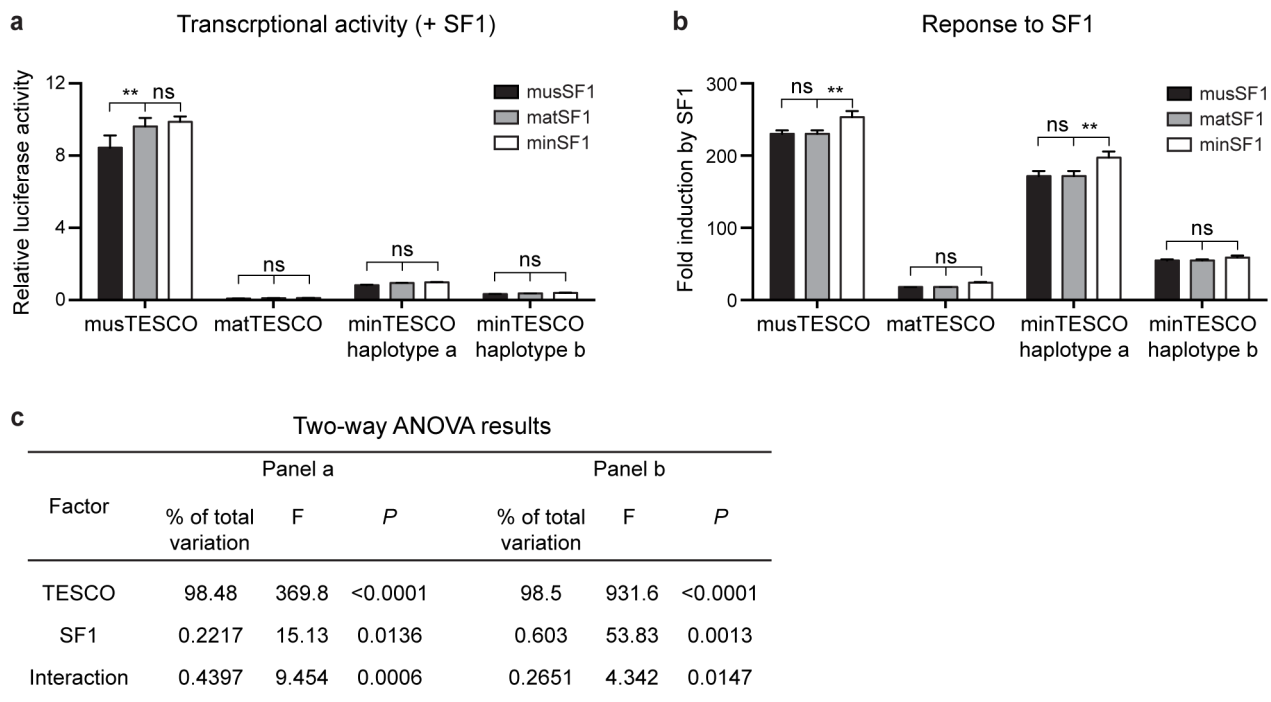

**Supplementary Figure S13. SF1 proteins from *M. musculus*, *M. mattheyi*, and *M. minutoides* show similar activities in min/matTESCO reporter assays.** (a,b) Activation of TESCO by SF1 from three *Mus* species were tested using *in vitro* reporter assays. Different TESCO reporter constructs contribute to > 98% of total variation (c). Compared with matSF1 and musSF1, minSF1 showed mildly higher activation of both musTESCO and minTESCO.a, but not minTESCO.b, suggesting that *Sfl* is unlikely to have co-evolved with TESCO in *M. minutoides* (see also Supplementary Fig. S14). The luciferase activity of each TESCO-Luc co-transfected with the empty vector in the absence of SF1 was set to 1. Error bars: s.e.m (n=3). (\*\*)  $P < 0.01$ , Tukey's multiple comparisons test. ns, not significant. (c) Summary of two-way repeated measures ANOVA results of (a,b).

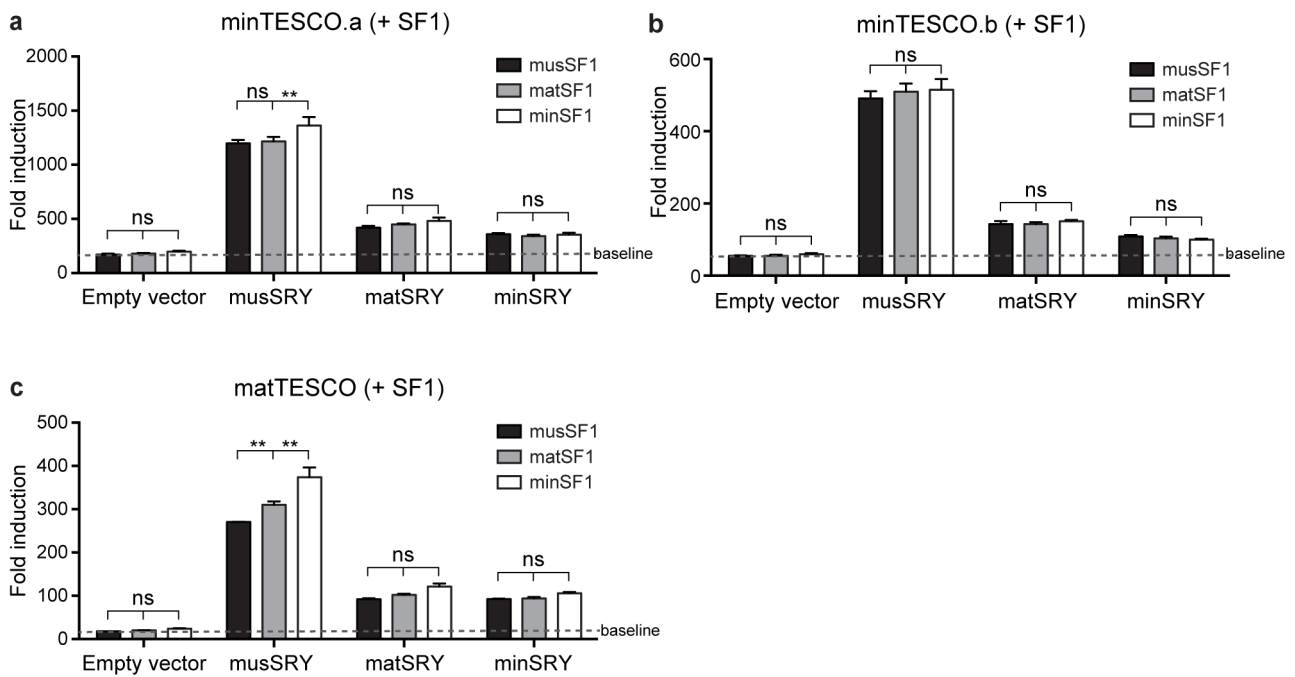

**d Two-way ANOVA results**

| Factor      | Panel a (minTESCO.a) |       |         | Panel b (minTESCO.b) |       |         | Panel c (matTESCO)   |       |         |
|-------------|----------------------|-------|---------|----------------------|-------|---------|----------------------|-------|---------|
|             | % of total variation | F     | P       | % of total variation | F     | P       | % of total variation | F     | P       |
| SRY         | 98.05                | 1208  | <0.0001 | 98.87                | 505.2 | <0.0001 | 95.26                | 1440  | <0.0001 |
| SF1         | 0.42                 | 2.277 | 0.2187  | 0.02                 | 0.479 | 0.6512  | 1.93                 | 13.41 | 0.0168  |
| Interaction | 0.47                 | 3.575 | 0.0287  | 0.08                 | 0.987 | 0.4756  | 1.97                 | 12.70 | 0.0001  |

**Supplementary Figure S14. SF1 proteins from *M. musculus*, *M. mattheyi*, and *M. minutoides* show similar activities in synergizing with different SRY in activating various TESCO reporters.** Synergistic activation of different TESCO luciferase reporters by various combinations of SRY and SF1 from *M. musculus*, *M. mattheyi*, and *M. minutoides* were tested using *in vitro* reporter assays (a-c). With all three TESCO reporters, different SRY constructs contribute to > 95% of total variation (d). Compared with matSF1 and musSF1, minSF1 showed mildly higher activation of minTESCO.a-Luc (a) and matTESCO-Luc (c) in the presence of musSRY. However, minSF1 did not outperform musSF1 or matSF1 in activating its cognate minTESCO.a/b-Luc reporters in the presence of cognate minSRY, suggesting that *Sfl* is unlikely to have co-evolved with *Sry* or TESCO in *M. minutoides*. The luciferase activity of each TESCO-Luc co-transfected with the empty vector in the absence of SF1 was set to 1. For simplicity, only the +SF1 data are

presented here as mean  $\pm$  s.e.m (n=3). Dashed lines indicate the levels of empty vector + musSF1. (\*\*)  $P < 0.01$ , Tukey's multiple comparisons test. ns, not significant. (d) Summary of two-way repeated measures ANOVA results of (a-c).

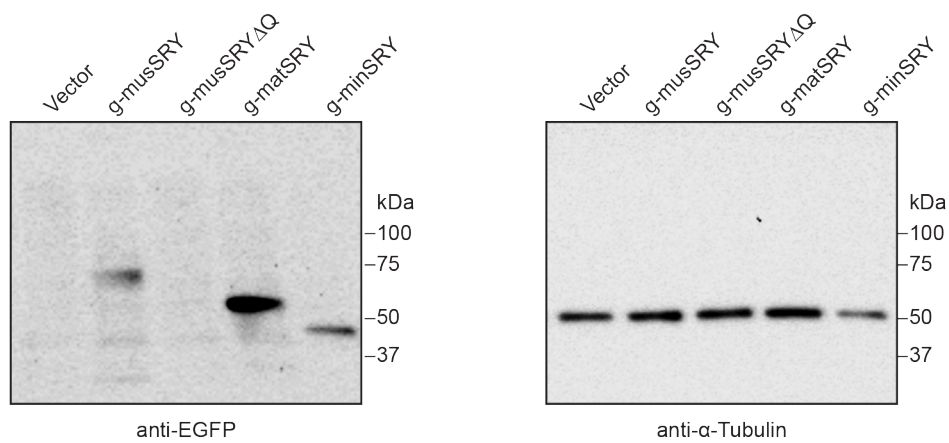

**Supplementary Figure S15. Full-length Western blots in Fig. 2b.** Predicted molecular weight: g-musSRY, 77.1 kDa; g-musSRY  $\Delta$ Q, 47.9 kDa; g-minSRY, 50.7 kDa; g-matSRY, 59.9 kDa;  $\alpha$ -Tubulin, 50 kDa.



**Supplementary Table S1.** PCR primers.

| Primer        | Sequence                                  | Note                               |
|---------------|-------------------------------------------|------------------------------------|
| Sry.Fw        | <u>AGATCT</u> AAGAGACAAGTTTTGGGACTGGTGACA | <i>Bgl</i> III site underlined     |
| Sry.Rv        | <u>CTCGAG</u> AGGGGGAGTGTTGGCATAGGTAGGAGA | <i>Xho</i> I site underlined       |
| TESCO.Fw      | CCAGCAAGATTTCTGCATATGTC                   |                                    |
| TESCO.Rv      | CACTTACCCAGCACCTCCATC                     |                                    |
| Sflexon2_3.Fw | agGCGGACGCCGCGGGCATGGACTATT               | Intronic sequence in small letters |
| Sflexon2_3.Rv | acCTTCCAGGCGCATGCCACCGTCA                 |                                    |
| Sflexon4.Fw   | agCTGTGCGTGCTGATCGAATG                    | Intronic sequence in small letters |
| Sflexon4.Rv   | acCTCCAGCTCCTTAAAGACCATGCA                |                                    |
| Sflexon5.Fw   | agGTGGCTGACCAGATGACACTGCT                 | Intronic sequence in small letters |
| Sflexon5.Rv   | acCTCCTGTCCAGTAACCAGCAGGAT                |                                    |
| Sflexon6.Fw   | agGTGGAGCTGAGCACAGTGGCTGT                 | Intronic sequence in small letters |
| Sflexon6.Rv   | acCGAGGCTGAAGAGGATGAGGAACTT               |                                    |
| Sflexon7.Fw   | gcagATGTGAAATTCCTGAACAACCACA              | Intronic sequence in small letters |
| Sflexon7.Rv   | CCTGGATCACCTAATGCAAGGAGTCTT               |                                    |
